# Supplementary material for: Phylogeny- and Abundance-Based Metrics Allow for the Consistent Comparison of Core Gut Microbiome Diversity Indices Across Host Species
Source: PubMed Central journal article supplement (PMC8144293; doi:10.3389/fmicb.2021.659918), 2021-05-11

## Supplementary figure

Phylogeny- and abundance-based metrics allow for the consistent comparison of core gut microbiome diversity indices across host species

**Figure S1)** The effect of read depth (post filtering) on diversity scores per species and per diversity measure. The figure shows the correlation coefficient (Spearman's rho) between sample read depth and sample diversity, coloured by species and shaped by whether the correlation was significant. The grey smoothed line shows average values when species are considered together.

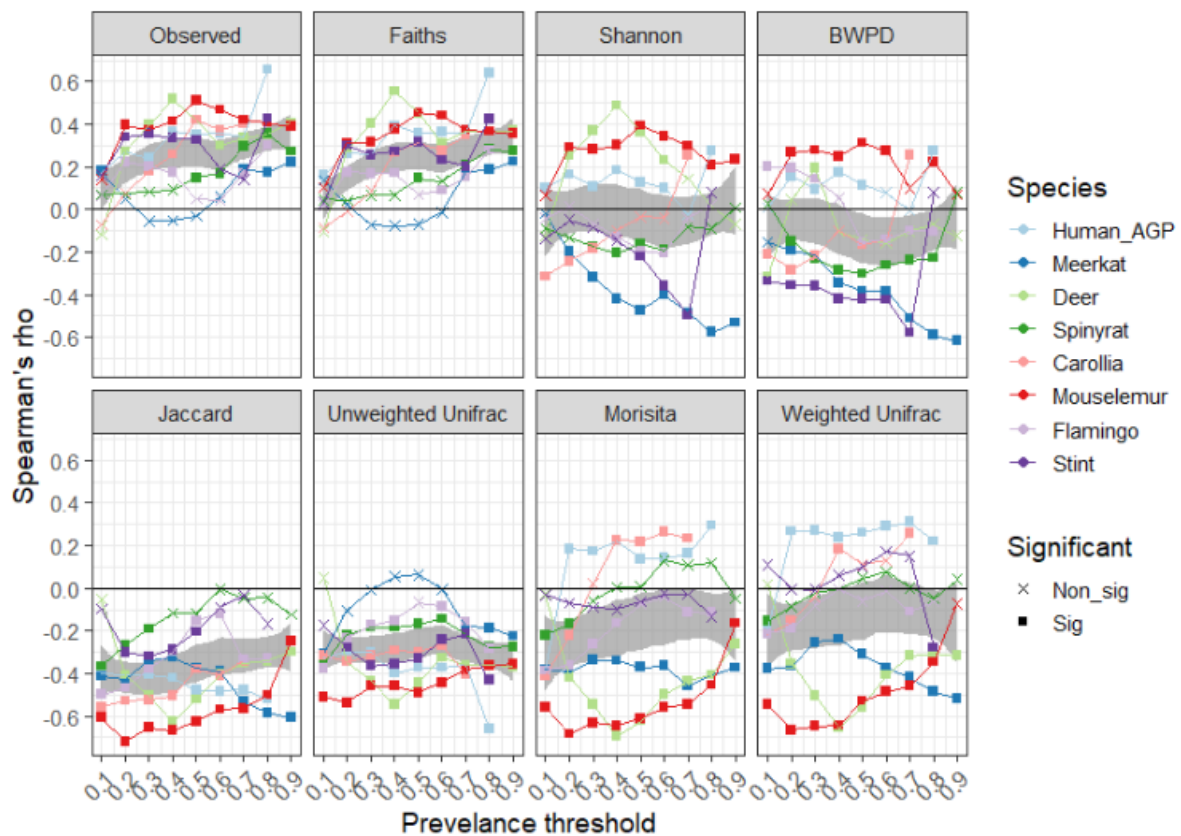

Supplement: Image_1.pdf [file Image_1.pdf]
